# Supplementary material
Source: publisher figshare collection journal article supplement (https://frontiersin.figshare.com/ndownloader/files/28874859)

**Supplementary Table 1. Base line data of the patients**

| Characteristics       | The expression of KCNQ1OT1 |                       | <i>P</i> value |               |
|-----------------------|----------------------------|-----------------------|----------------|---------------|
|                       | low expression(n=10)       | high expression(n=10) |                |               |
| Gender                | Male                       | 5                     | 6              | 1.000         |
|                       | Female                     | 5                     | 4              |               |
| Age(years)            | <60                        | 4                     | 4              | 1.000         |
|                       | ≥60                        | 6                     | 6              |               |
| Lymph node metastasis | Absence                    |                       |                | <b>0.022*</b> |
|                       | Presence                   | 3                     | 1              |               |
|                       |                            | 7                     | 9              |               |

\*  $P < 0.05$  by Chi-Square test

**Supplementary Table 2. patients information of cases used for lncRNA analysis**

| Case number | Age | Gender | T stage | N stage | M stage | Stage      | colon polyps present | lymph node examined count | lymphatic invasion |
|-------------|-----|--------|---------|---------|---------|------------|----------------------|---------------------------|--------------------|
| 1           | 68  | Female | T1      | N0      | M0      | Stage I    | Not Available        | Not Available             | NO                 |
| 2           | 48  | Female | T1      | N0      | M0      | Stage II   | NO                   | 17                        | NO                 |
| 3           | 65  | Male   | T3      | N1      | M1      | Stage IV   | Not Available        | 34                        | Not Available      |
| 4           | 73  | Female | T2      | N0      | M0      | Stage I    | NO                   | 24                        | NO                 |
| 5           | 54  | Male   | T3      | N0      | M0      | Stage IIA  | YES                  | 32                        | NO                 |
| 6           | 50  | Male   | T3      | N2b     | M1      | Stage IIIC | NO                   | 15                        | NO                 |
| 7           | 54  | Female | T3      | N0      | M0      | Stage IIA  | YES                  | 12                        | NO                 |
| 8           | 73  | Female | T3      | N2      | M0      | Stage II   | Not Available        | 17                        | YES                |

**Supplementary table 3. Primer sequence**

---

|                       | <b>Primer Sequence</b>           |
|-----------------------|----------------------------------|
| miR-30a-5p<br>forward | 5'- GGC GTGTAAACATCCTCGACTG -3 ' |
| miR-30a-5p<br>reverse | 5'- GTGCAGGGTCCG AGGT -3'        |
| U6 forward            | 5'-CTCGCTTCGGCAGCACATA-3'        |
| U6 reverse            | 5'-AACGATTCACGAATTTGCGT-3'       |
| USP22 forward         | 5'-CCCCTCACATCCCGTATA-3'         |
| USP22 reverse         | 5'-TTCCCATTTGTCATCACCTT-3'       |
| PD-L1 forward         | 5'-GCCGACTACAAGCGAATTAC-3'       |
| PD-L1 reverse         | 5'-TCTCAGTGTGCTGGTCACAT-3'       |
| KCNQ1OT1<br>forward   | 5'-TGCAGAAGACAGGACACTGG-3'       |
| KCNQ1OT1<br>reverse   | 5'-CTTTGGTGGGAAAGGACAGA-3'       |
| GAPDH forward         | 5'-GAAGGTGAAGGTCGGAGTC-3'        |
| GAPDH reverse         | 5'-GAAGATGGTGATGGGATTTTC-3'      |

---

## Supplementary Figure 1 Differential gene screening of different samples

(A). The heat-map of top10 upregulated and down-regulated lncRNAs in CRC samples in comparison with corresponding tissues. (B). Immunofluorescence staining uses PKH26 to label exosomes to detect the entry of exosomes into SW1463 at 2h and 24h, respectively. (C). Heat map is used to show the differential expression of miRNA between tumor tissues treated with exosomes and untreated tumor tissues. (D). Venn diagram for screening miRNA. (E). The differential expression of miR-330-3p, miR-30a-5p and miR-515-5p in tumor tissues after overexpression of KCNQ1OT1 was detected. (F). TCGA database is used to analyze the correlation between KCNQ1OT1 and miR-30a-5p in tumor tissues.

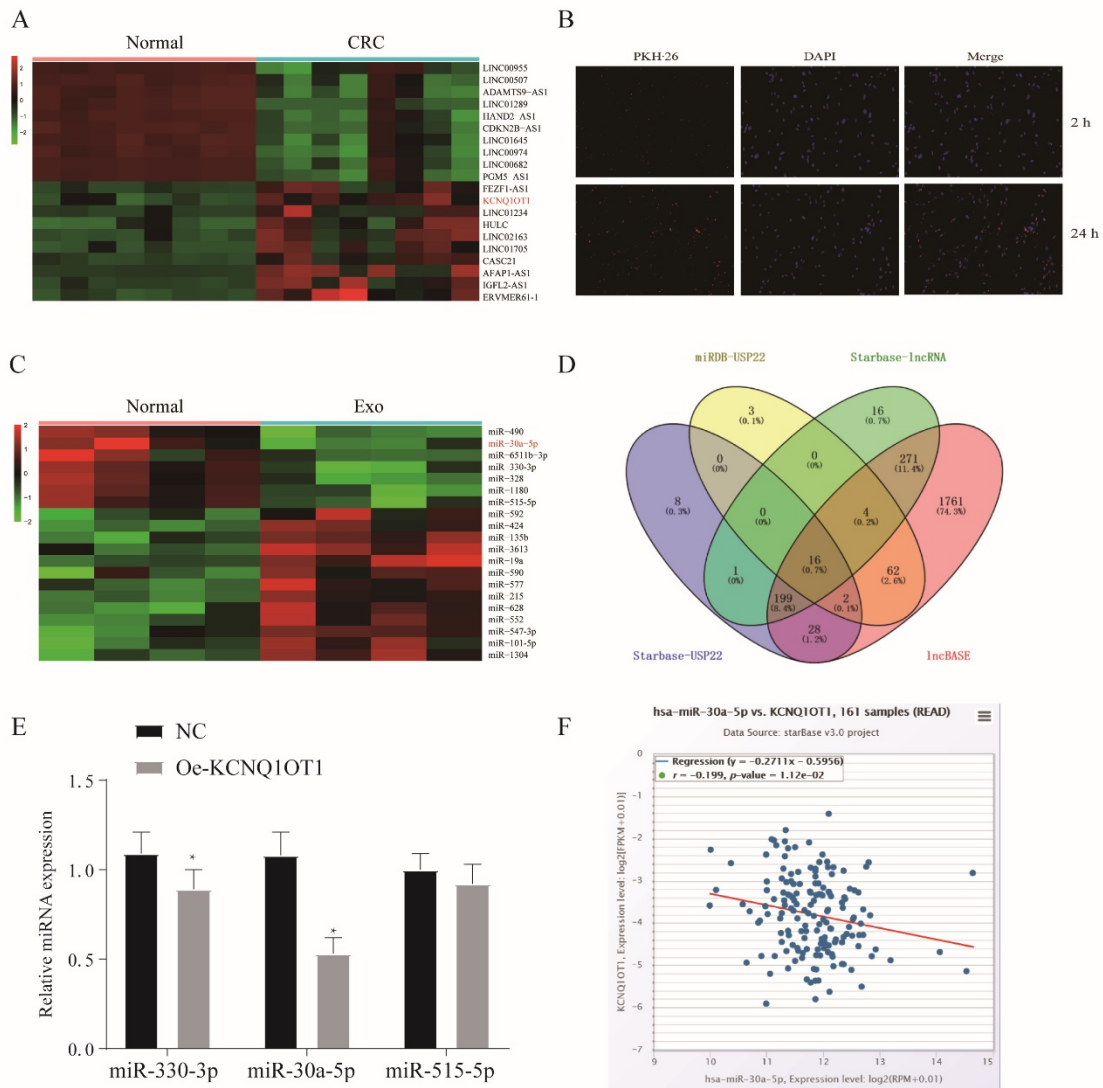

**Supplementary Figure 2 Detection of PD-L1 and KCNQ1OT1 expression in different tissues**

(A). The expression of KCNQ1OT1 in tumor tissues from different treatment groups. (B, D). PD-L1 mRNA and protein expression in patients tissues. (C). TCGA database verifies the expression of PD-L1 mRNA in tumor tissues. (E). Expression of PD-L1 mRNA in different types of CRC cells. (F). PD-L1 protein expression in different groups. \* $P < 0.05$ , compared with relative control group.

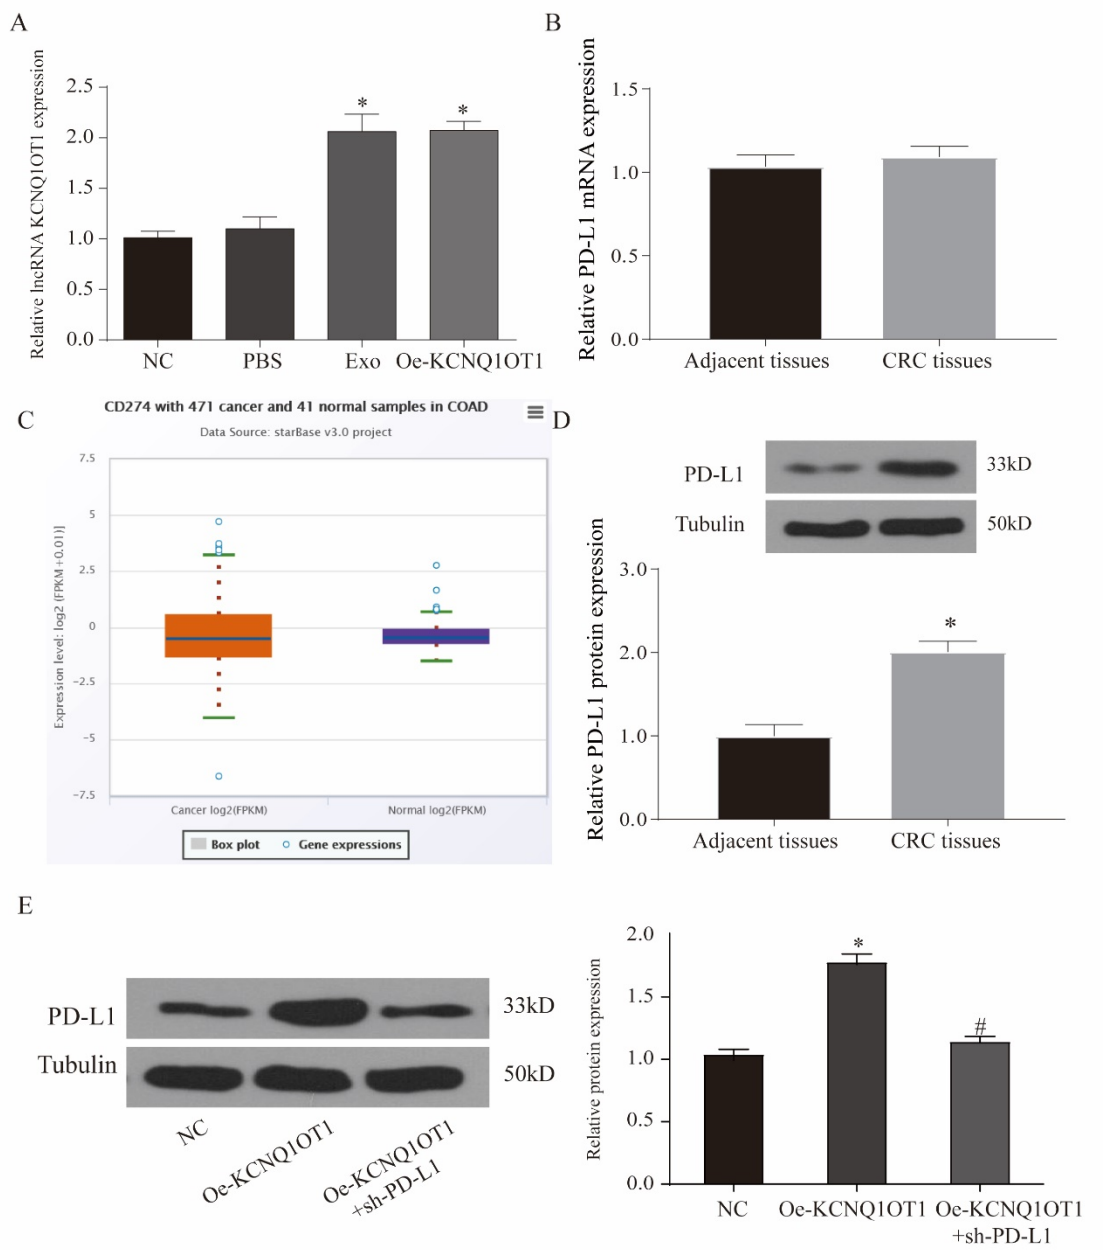

### Supplementary Figure 3 KCNQ1OT1, miR-30a-5p and USP22 regulatory relationship

#### detection.

(A). RT-qPCR is used to detect the expression of miR-30a-5p after overexpression of KCNQ1OT1. (B). RT-qPCR is used to detect the expression of USP22 after overexpression of miR-30a-5p. \* $P < 0.05$ , compared with relative control group.

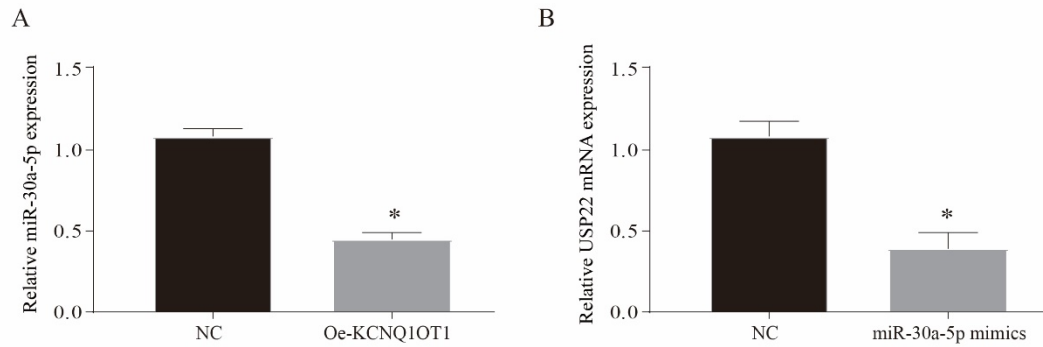

Supplement: Supplementary file [file 28874859]
